# Supplementary material
Source: ML conference proceedings conference paper supplement (https://openreview.net/forum?id=ECBK3TVmZl)
Supplement: supplementary_material [file attachment]

## A Proof of Lemma 1

The  $\varepsilon$ -sensitivity of distributions is defined below.

**Definition A1 ( $\varepsilon$ -Sensitivity).** A distribution  $\mathcal{D}(\cdot)$  is called  $\varepsilon$ -sensitive if for any  $\boldsymbol{\theta}, \boldsymbol{\theta}' \in \Theta$  there exists a constant  $\varepsilon > 0$  such that

$$\mathcal{W}_1(\mathcal{D}(\boldsymbol{\theta}), \mathcal{D}(\boldsymbol{\theta}')) \leq \varepsilon \|\boldsymbol{\theta} - \boldsymbol{\theta}'\|_2,$$

where  $\mathcal{W}_1(\mathcal{D}, \mathcal{D}')$  denotes the Wasserstein-1 distance.

Next, we provide the following lemma.

**Lemma A1.** Suppose that the distribution map  $\mathcal{D}(\boldsymbol{\theta})$  forms a location family (7). Then, we have

$$\mathcal{W}_1(\mathcal{D}(\boldsymbol{\theta}), \mathcal{D}(\boldsymbol{\theta}')) \leq \|\mathbf{A}(\boldsymbol{\theta} - \boldsymbol{\theta}')\|_2.$$

*Proof.* By definition,  $\mathcal{W}_1(\mathcal{D}(\boldsymbol{\theta}), \mathcal{D}(\boldsymbol{\theta}')) := \inf_{\Gamma(\mathcal{D}(\boldsymbol{\theta}), \mathcal{D}(\boldsymbol{\theta}'))} \mathbb{E}_{(Z_{\boldsymbol{\theta}}, Z_{\boldsymbol{\theta}'}) \sim (\mathcal{D}(\boldsymbol{\theta}), \mathcal{D}(\boldsymbol{\theta}'))} \|Z_{\boldsymbol{\theta}} - Z_{\boldsymbol{\theta}'}\|_2$ , where  $\Gamma(\mathcal{D}(\boldsymbol{\theta}), \mathcal{D}(\boldsymbol{\theta}'))$  is the set of all couplings of the distributions  $\mathcal{D}(\boldsymbol{\theta})$  and  $\mathcal{D}(\boldsymbol{\theta}')$ . One way to couple  $\mathcal{D}(\boldsymbol{\theta})$  and  $\mathcal{D}(\boldsymbol{\theta}')$  is to set  $Z_{\boldsymbol{\theta}} \sim \mathcal{D}(\boldsymbol{\theta})$  and  $Z_{\boldsymbol{\theta}'} \sim \mathcal{D}(\boldsymbol{\theta}')$ . Under this setting, with the definition of  $\mathcal{D}(\boldsymbol{\theta})$  (7), we have  $\mathbb{E}_{(Z_{\boldsymbol{\theta}}, Z_{\boldsymbol{\theta}'}) \sim (\mathcal{D}(\boldsymbol{\theta}), \mathcal{D}(\boldsymbol{\theta}'))} \|Z_{\boldsymbol{\theta}} - Z_{\boldsymbol{\theta}'}\|_2 = \|\mathbf{A}(\boldsymbol{\theta} - \boldsymbol{\theta}')\|_2$ , and hence  $\mathcal{W}_1(\mathcal{D}(\boldsymbol{\theta}), \mathcal{D}(\boldsymbol{\theta}')) \leq \|\mathbf{A}(\boldsymbol{\theta} - \boldsymbol{\theta}')\|_2$ .  $\square$

Define  $\sigma_{\max}(\mathbf{A}) := \max_{\|\boldsymbol{\theta}\|_2=1} \|\mathbf{A}\boldsymbol{\theta}\|_2$ , we have  $\|\mathbf{A}(\boldsymbol{\theta} - \boldsymbol{\theta}')\|_2 \leq \sigma_{\max}(\mathbf{A}) \|\boldsymbol{\theta} - \boldsymbol{\theta}'\|_2$ . By Lemma A1,  $\mathcal{W}_1(\mathcal{D}(\boldsymbol{\theta}), \mathcal{D}(\boldsymbol{\theta}')) \leq \sigma_{\max}(\mathbf{A}) \|\boldsymbol{\theta} - \boldsymbol{\theta}'\|_2$ . By Definition A1, the sensitivity parameter  $\varepsilon \leq \sigma_{\max}(\mathbf{A})$ , which proves Lemma 1.

## B Proof of Lemma 2

*Proof of the  $L$ -Lipschitz continuity of  $\text{PR}(\boldsymbol{\theta})$ .* To show the  $L$ -Lipschitz continuity of  $\text{PR}(\boldsymbol{\theta})$ , it suffices to show that there exists a positive constant  $L$  such that, for any  $\boldsymbol{\theta}, \boldsymbol{\theta}' \in \Theta$ ,  $\|\text{PR}(\boldsymbol{\theta}) - \text{PR}(\boldsymbol{\theta}')\|_2 \leq L \|\boldsymbol{\theta} - \boldsymbol{\theta}'\|_2$ . By Assumption 1, the loss function  $\ell(\boldsymbol{\theta}; Z)$  is  $L_{\boldsymbol{\theta}}$ -Lipschitz continuous in  $\boldsymbol{\theta}$  and  $L_Z$ -Lipschitz continuous in  $Z$ , i.e.,

$$\|\ell(\boldsymbol{\theta}; Z) - \ell(\boldsymbol{\theta}'; Z')\|_2 \leq L_{\boldsymbol{\theta}} \|\boldsymbol{\theta} - \boldsymbol{\theta}'\|_2 + L_Z \|Z - Z'\|_2, \forall \boldsymbol{\theta}, \boldsymbol{\theta}' \in \Theta, Z, Z' \in \mathbb{R}^k.$$

Then, we have

$$\begin{aligned} & \left\| \mathbb{E}_{Z_0 \sim \mathcal{D}_0} \ell(\boldsymbol{\theta}; Z_0 + \mathbf{A}\boldsymbol{\theta}) - \mathbb{E}_{Z_0 \sim \mathcal{D}_0} \ell(\boldsymbol{\theta}'; Z_0 + \mathbf{A}\boldsymbol{\theta}') \right\|_2 \\ & \leq \mathbb{E}_{Z_0 \sim \mathcal{D}_0} \|\ell(\boldsymbol{\theta}; Z_0 + \mathbf{A}\boldsymbol{\theta}) - \ell(\boldsymbol{\theta}'; Z_0 + \mathbf{A}\boldsymbol{\theta}')\|_2 \\ & \leq L_{\boldsymbol{\theta}} \|\boldsymbol{\theta} - \boldsymbol{\theta}'\|_2 + L_Z \|\mathbf{A}(\boldsymbol{\theta} - \boldsymbol{\theta}')\|_2 \\ & \leq (L_{\boldsymbol{\theta}} + L_Z \sigma_{\max}(\mathbf{A})) \|\boldsymbol{\theta} - \boldsymbol{\theta}'\|_2. \end{aligned}$$

Thus, there exists a constant  $L \leq L_{\boldsymbol{\theta}} + L_Z \sigma_{\max}(\mathbf{A})$  such that  $\|\text{PR}(\boldsymbol{\theta}) - \text{PR}(\boldsymbol{\theta}')\|_2 \leq L \|\boldsymbol{\theta} - \boldsymbol{\theta}'\|_2$ ,  $\forall \boldsymbol{\theta}, \boldsymbol{\theta}' \in \Theta$ , which proves the  $L$ -Lipschitz continuity of  $\text{PR}(\boldsymbol{\theta})$ .  $\square$

*Proof of the  $\gamma$ -strongly convexity of  $\text{PR}(\boldsymbol{\theta})$ .* By Assumption 1,  $\ell(\boldsymbol{\theta}; Z)$  is  $\gamma_Z$ -strongly convex in  $Z$ . Then, we have

$$\begin{aligned} \mathbb{E}_{Z \sim \mathcal{D}(\boldsymbol{\theta})} \ell(\boldsymbol{\theta}; Z) & \geq \mathbb{E}_{Z \sim \mathcal{D}(\alpha\boldsymbol{\theta} + (1-\alpha)\boldsymbol{\theta}')} \ell(\boldsymbol{\theta}; Z) + \frac{(1-\alpha)^2 \gamma_Z}{2} \|\mathbf{A}(\boldsymbol{\theta} - \boldsymbol{\theta}')\|_2^2 \\ & \quad + (1-\alpha) \left( \nabla_Z \mathbb{E}_{Z \sim \mathcal{D}(\alpha\boldsymbol{\theta} + (1-\alpha)\boldsymbol{\theta}')} \ell(\boldsymbol{\theta}; Z) \right)^\top \mathbf{A}(\boldsymbol{\theta} - \boldsymbol{\theta}'), \end{aligned} \quad (\text{b1})$$

$$\begin{aligned} \mathbb{E}_{Z \sim \mathcal{D}(\boldsymbol{\theta}')} \ell(\boldsymbol{\theta}; Z) & \geq \mathbb{E}_{Z \sim \mathcal{D}(\alpha\boldsymbol{\theta} + (1-\alpha)\boldsymbol{\theta}')} \ell(\boldsymbol{\theta}; Z) + \frac{\alpha^2 \gamma_Z}{2} \|\mathbf{A}(\boldsymbol{\theta} - \boldsymbol{\theta}')\|_2^2 \\ & \quad - \alpha \left( \nabla_Z \mathbb{E}_{Z \sim \mathcal{D}(\alpha\boldsymbol{\theta} + (1-\alpha)\boldsymbol{\theta}')} \ell(\boldsymbol{\theta}; Z) \right)^\top \mathbf{A}(\boldsymbol{\theta} - \boldsymbol{\theta}'). \end{aligned} \quad (\text{b2})$$

Combining  $\alpha(\text{b1}) + (1 - \alpha)(\text{b2})$ , we obtain

$$\begin{aligned} & \alpha \mathbb{E}_{Z \sim \mathcal{D}(\boldsymbol{\theta})} \ell(\boldsymbol{\theta}; Z) + (1 - \alpha) \mathbb{E}_{Z \sim \mathcal{D}(\boldsymbol{\theta}')} \ell(\boldsymbol{\theta}; Z) \\ & \geq \mathbb{E}_{Z \sim \mathcal{D}(\alpha\boldsymbol{\theta} + (1-\alpha)\boldsymbol{\theta}')} \ell(\boldsymbol{\theta}; Z) + \frac{\alpha(1-\alpha)\gamma_Z}{2} \|\mathbf{A}(\boldsymbol{\theta} - \boldsymbol{\theta}')\|_2^2. \end{aligned} \quad (\text{b3})$$

In (b3), fixing the first argument of  $\ell(\boldsymbol{\theta}; Z)$  at  $\boldsymbol{\theta}_0$ ,  $\forall \boldsymbol{\theta}_0 \in \boldsymbol{\Theta}$ , and subtracting  $\frac{\gamma_Z}{2} \|\mathbf{A}(\alpha\boldsymbol{\theta} + (1-\alpha)\boldsymbol{\theta}')\|_2^2$  on both sides, we obtain

$$\begin{aligned} & \mathbb{E}_{Z \sim \mathcal{D}(\alpha\boldsymbol{\theta}_0 + (1-\alpha)\boldsymbol{\theta}')} \ell(\boldsymbol{\theta}_0; Z) - \frac{\gamma_Z}{2} \|\mathbf{A}(\alpha\boldsymbol{\theta}_0 + (1-\alpha)\boldsymbol{\theta}')\|_2^2 \\ & \leq \alpha \mathbb{E}_{Z \sim \mathcal{D}(\boldsymbol{\theta}_0)} \ell(\boldsymbol{\theta}_0; Z) + (1 - \alpha) \mathbb{E}_{Z \sim \mathcal{D}(\boldsymbol{\theta}')} \ell(\boldsymbol{\theta}_0; Z) - \frac{\alpha(1-\alpha)\gamma_Z}{2} \|\mathbf{A}(\boldsymbol{\theta} - \boldsymbol{\theta}')\|_2^2 \\ & \quad - \frac{\gamma_Z}{2} \|\mathbf{A}(\alpha\boldsymbol{\theta}_0 + (1-\alpha)\boldsymbol{\theta}')\|_2^2 \\ & = \alpha \left( \mathbb{E}_{Z \sim \mathcal{D}(\boldsymbol{\theta}_0)} \ell(\boldsymbol{\theta}_0; Z) - \frac{\gamma_Z}{2} \|\mathbf{A}\boldsymbol{\theta}_0\|_2^2 \right) + (1 - \alpha) \left( \mathbb{E}_{Z \sim \mathcal{D}(\boldsymbol{\theta}')} \ell(\boldsymbol{\theta}_0; Z) - \frac{\gamma_Z}{2} \|\mathbf{A}\boldsymbol{\theta}'\|_2^2 \right). \end{aligned} \quad (\text{b4})$$

Eq. (b4) demonstrates that the function  $\mathbb{E}_{Z \sim \mathcal{D}(\boldsymbol{\theta})} \ell(\boldsymbol{\theta}_0; Z) - \frac{\gamma_Z}{2} \|\mathbf{A}\boldsymbol{\theta}\|_2^2$  is convex in  $\boldsymbol{\theta}$  for any given  $\boldsymbol{\theta}_0 \in \boldsymbol{\Theta}$ . By the equivalent first-order characterization, we have

$$\begin{aligned} \mathbb{E}_{Z \sim \mathcal{D}(\boldsymbol{\theta}')} \ell(\boldsymbol{\theta}_0; Z) & \geq \frac{\gamma_Z}{2} \|\mathbf{A}\boldsymbol{\theta}'\|_2^2 + \mathbb{E}_{Z \sim \mathcal{D}(\boldsymbol{\theta})} \ell(\boldsymbol{\theta}_0; Z) - \frac{\gamma_Z}{2} \|\mathbf{A}\boldsymbol{\theta}\|_2^2 \\ & \quad + \left( \mathbb{E}_{Z \sim \mathcal{D}(\boldsymbol{\theta})} \mathbf{A}^\top \nabla_Z \ell(\boldsymbol{\theta}_0; Z) \right)^\top (\boldsymbol{\theta}' - \boldsymbol{\theta}) - \gamma_Z (\mathbf{A}^\top \mathbf{A}\boldsymbol{\theta})^\top (\boldsymbol{\theta}' - \boldsymbol{\theta}) \\ & = \mathbb{E}_{Z \sim \mathcal{D}(\boldsymbol{\theta})} \ell(\boldsymbol{\theta}_0; Z) + \left( \mathbb{E}_{Z \sim \mathcal{D}(\boldsymbol{\theta})} \mathbf{A}^\top \nabla_Z \ell(\boldsymbol{\theta}_0; Z) \right)^\top (\boldsymbol{\theta}' - \boldsymbol{\theta}) + \frac{\gamma_Z}{2} \|\mathbf{A}(\boldsymbol{\theta} - \boldsymbol{\theta}')\|_2^2. \end{aligned}$$

Setting  $\boldsymbol{\theta}_0 = \boldsymbol{\theta}$  gives

$$\begin{aligned} & \left( \mathbb{E}_{Z \sim \mathcal{D}(\boldsymbol{\theta})} \mathbf{A}^\top \nabla_Z \ell(\boldsymbol{\theta}; Z) \right)^\top (\boldsymbol{\theta}' - \boldsymbol{\theta}) \\ & \leq \mathbb{E}_{Z \sim \mathcal{D}(\boldsymbol{\theta}')} \ell(\boldsymbol{\theta}; Z) - \mathbb{E}_{Z \sim \mathcal{D}(\boldsymbol{\theta})} \ell(\boldsymbol{\theta}; Z) - \frac{\gamma_Z}{2} \|\mathbf{A}(\boldsymbol{\theta} - \boldsymbol{\theta}')\|_2^2. \end{aligned} \quad (\text{b5})$$

Further, since  $\ell(\boldsymbol{\theta}; Z)$  is  $\gamma_\theta$ -strongly convex in  $\boldsymbol{\theta}$ , we have

$$\mathbb{E}_{Z \sim \mathcal{D}(\boldsymbol{\theta}')} \ell(\boldsymbol{\theta}; Z) \leq \mathbb{E}_{Z \sim \mathcal{D}(\boldsymbol{\theta}')} \ell(\boldsymbol{\theta}'; Z) - \left( \mathbb{E}_{Z \sim \mathcal{D}(\boldsymbol{\theta}')} \nabla_\theta \ell(\boldsymbol{\theta}; Z) \right)^\top (\boldsymbol{\theta}' - \boldsymbol{\theta}) - \frac{\gamma_\theta}{2} \|\boldsymbol{\theta} - \boldsymbol{\theta}'\|_2^2. \quad (\text{b6})$$

Plugging (b6) into (b5) yields

$$\begin{aligned} & \left( \mathbb{E}_{Z \sim \mathcal{D}(\boldsymbol{\theta})} \mathbf{A}^\top \nabla_Z \ell(\boldsymbol{\theta}; Z) \right)^\top (\boldsymbol{\theta}' - \boldsymbol{\theta}) + \left( \mathbb{E}_{Z \sim \mathcal{D}(\boldsymbol{\theta}')} \nabla_\theta \ell(\boldsymbol{\theta}; Z) \right)^\top (\boldsymbol{\theta}' - \boldsymbol{\theta}) \\ & \leq \mathbb{E}_{Z \sim \mathcal{D}(\boldsymbol{\theta}')} \ell(\boldsymbol{\theta}'; Z) - \mathbb{E}_{Z \sim \mathcal{D}(\boldsymbol{\theta})} \ell(\boldsymbol{\theta}; Z) - \frac{\gamma_Z}{2} \|\mathbf{A}(\boldsymbol{\theta} - \boldsymbol{\theta}')\|_2^2 - \frac{\gamma_\theta}{2} \|\boldsymbol{\theta} - \boldsymbol{\theta}'\|_2^2. \end{aligned}$$

Rearranging the terms in the above inequality gives

$$\begin{aligned} \text{PR}(\boldsymbol{\theta}') & \geq \text{PR}(\boldsymbol{\theta}) + \nabla_\theta \text{PR}(\boldsymbol{\theta})^\top (\boldsymbol{\theta}' - \boldsymbol{\theta}) + \frac{\gamma_Z}{2} \|\mathbf{A}(\boldsymbol{\theta} - \boldsymbol{\theta}')\|_2^2 + \frac{\gamma_\theta}{2} \|\boldsymbol{\theta} - \boldsymbol{\theta}'\|_2^2 \\ & \quad + \left( \mathbb{E}_{Z \sim \mathcal{D}(\boldsymbol{\theta}')} \nabla_\theta \ell(\boldsymbol{\theta}; Z) - \mathbb{E}_{Z \sim \mathcal{D}(\boldsymbol{\theta})} \nabla_\theta \ell(\boldsymbol{\theta}; Z) \right)^\top (\boldsymbol{\theta}' - \boldsymbol{\theta}). \end{aligned} \quad (\text{b7})$$

By the  $\beta$ -smoothness of  $\text{PR}(\boldsymbol{\theta})$ , we have

$$\begin{aligned} & \left( \mathbb{E}_{Z \sim \mathcal{D}(\boldsymbol{\theta}')} \nabla_\theta \ell(\boldsymbol{\theta}; Z) - \mathbb{E}_{Z \sim \mathcal{D}(\boldsymbol{\theta})} \nabla_\theta \ell(\boldsymbol{\theta}; Z) \right)^\top (\boldsymbol{\theta}' - \boldsymbol{\theta}) \\ & \geq -\beta \|\mathbf{A}(\boldsymbol{\theta} - \boldsymbol{\theta}')\|_2 \|\boldsymbol{\theta} - \boldsymbol{\theta}'\|_2 \\ & \geq -\frac{\gamma_Z}{2} \|\mathbf{A}(\boldsymbol{\theta} - \boldsymbol{\theta}')\|_2^2 - \frac{\beta^2}{2\gamma_Z} \|\boldsymbol{\theta} - \boldsymbol{\theta}'\|_2^2. \end{aligned} \quad (\text{b8})$$

Plugging (b8) into (b7) yields

$$\text{PR}(\boldsymbol{\theta}') \geq \text{PR}(\boldsymbol{\theta}) + \nabla_{\boldsymbol{\theta}} \text{PR}(\boldsymbol{\theta}) (\boldsymbol{\theta}' - \boldsymbol{\theta}) + \frac{1}{2} \left( \gamma_{\boldsymbol{\theta}} - \frac{\beta^2}{\gamma_Z} \right) \|\boldsymbol{\theta} - \boldsymbol{\theta}'\|_2^2.$$

Therefore, the convexity parameter of  $\text{PR}(\boldsymbol{\theta})$  satisfies  $\gamma \geq \gamma_{\boldsymbol{\theta}} - \frac{\beta^2}{\gamma_Z}$ . In addition, by the  $\varepsilon$ -sensitivity of  $\text{PR}(\boldsymbol{\theta})$ , we have

$$\left( \mathbb{E}_{Z \sim \mathcal{D}(\boldsymbol{\theta}')} \nabla_{\boldsymbol{\theta}} \ell(\boldsymbol{\theta}; Z) - \mathbb{E}_{Z_0 \sim \mathcal{D}(\boldsymbol{\theta})} \nabla_{\boldsymbol{\theta}} \ell(\boldsymbol{\theta}; Z) \right)^\top (\boldsymbol{\theta}' - \boldsymbol{\theta}) \geq -\varepsilon \beta \|\boldsymbol{\theta} - \boldsymbol{\theta}'\|_2^2. \quad (\text{b9})$$

Plugging (b9) into (b7) yields

$$\text{PR}(\boldsymbol{\theta}') \geq \text{PR}(\boldsymbol{\theta}) + \nabla_{\boldsymbol{\theta}} \text{PR}(\boldsymbol{\theta}) (\boldsymbol{\theta}' - \boldsymbol{\theta}) + \frac{1}{2} (\gamma_{\boldsymbol{\theta}} - 2\varepsilon\beta + \gamma_Z \sigma_{\min}^2(\mathbf{A})) \|\boldsymbol{\theta} - \boldsymbol{\theta}'\|_2^2,$$

where  $\sigma_{\min}(\mathbf{A}) := \min_{\|\boldsymbol{\theta}\|_2=1} \|\mathbf{A}\boldsymbol{\theta}\|_2$ . Thus, we also have  $\gamma \geq \gamma_{\boldsymbol{\theta}} - 2\varepsilon\beta + \gamma_Z \sigma_{\min}^2(\mathbf{A})$ . Combining the above results, we obtain  $\gamma \geq \max \{ \gamma_{\boldsymbol{\theta}} - \beta^2/\gamma_Z, \gamma_{\boldsymbol{\theta}} - 2\varepsilon\beta + \gamma_Z \sigma_{\min}^2(\mathbf{A}) \}$ , which proves the  $\gamma$ -strongly convexity of  $\text{PR}(\boldsymbol{\theta})$ .  $\square$

### C Proof of Lemma 3

The proof of Lemma 3 utilizes the following two supporting lemmas.

**Lemma C1.** *Consider the update steps (5) and (6). Under Assumptions 1-3, for any  $\boldsymbol{\theta} \in \Theta$ ,  $\boldsymbol{\lambda} \in \mathbb{R}_+^m$ , and  $t \in [T]$ , the Lagrangian (2) satisfies:*

$$\begin{aligned} \sum_{t=1}^T (\mathcal{L}(\boldsymbol{\theta}_t, \boldsymbol{\lambda}) - \mathcal{L}(\boldsymbol{\theta}, \boldsymbol{\lambda}_t)) &\leq \frac{2R^2}{\eta} + \frac{\|\boldsymbol{\lambda}\|_2^2}{2\eta} + \frac{\eta}{2} \sum_{t=1}^T \|\nabla_{\boldsymbol{\lambda}} \mathcal{L}(\boldsymbol{\theta}_t, \boldsymbol{\lambda}_t)\|_2^2 + \frac{\eta}{2} \sum_{t=1}^T \left\| \nabla_{\boldsymbol{\theta}} \widehat{\mathcal{L}}_t(\boldsymbol{\theta}_t, \boldsymbol{\lambda}_t) \right\|_2^2 \\ &\quad + \sum_{t=1}^T \left\langle \boldsymbol{\theta}_t - \boldsymbol{\theta}, \nabla_{\boldsymbol{\theta}} \mathcal{L}(\boldsymbol{\theta}_t, \boldsymbol{\lambda}_t) - \nabla_{\boldsymbol{\theta}} \widehat{\mathcal{L}}_t(\boldsymbol{\theta}_t, \boldsymbol{\lambda}_t) \right\rangle, \end{aligned} \quad (\text{c1})$$

where  $\mathbb{R}_+$  represents the set of non-negative real numbers.

Lemma C1 establishes a relationship between the Lagrangian (2) and the primal and dual variables in the robust primal-dual framework. In particular, in (c1), the last term is introduced due to the gradient approximation. If the approximate gradient  $\nabla_{\boldsymbol{\theta}} \widehat{\mathcal{L}}_t(\boldsymbol{\theta}_t, \boldsymbol{\lambda}_t)$  is unbiased, we have  $\mathbb{E} \left[ \nabla_{\boldsymbol{\theta}} \mathcal{L}(\boldsymbol{\theta}_t, \boldsymbol{\lambda}_t) - \nabla_{\boldsymbol{\theta}} \widehat{\mathcal{L}}_t(\boldsymbol{\theta}_t, \boldsymbol{\lambda}_t) \right] = \mathbf{0}$ . Then, the last term in (c1) is eliminated by taking expectation. This is often the case in stochastic optimization without performativity [Tan et al., 2018; Yan et al., 2019; Cao and Başar, 2022]. However, in performative prediction, it is difficult to construct an unbiased gradient approximation because the unknown performative effect of decisions changes data distributions. Therefore, we must carry out the worst-case analysis on this term. In next lemma, we bound the  $\ell_2$  norms of the gradients  $\|\nabla_{\boldsymbol{\lambda}} \mathcal{L}(\boldsymbol{\theta}_t, \boldsymbol{\lambda}_t)\|_2^2$  and  $\left\| \nabla_{\boldsymbol{\theta}} \widehat{\mathcal{L}}_t(\boldsymbol{\theta}_t, \boldsymbol{\lambda}_t) \right\|_2^2$  in (c1).

**Lemma C2.** *For any  $t \in [T]$ , the gradients  $\nabla_{\boldsymbol{\lambda}} \mathcal{L}(\boldsymbol{\theta}_t, \boldsymbol{\lambda}_t)$  and  $\nabla_{\boldsymbol{\theta}} \widehat{\mathcal{L}}_t(\boldsymbol{\theta}_t, \boldsymbol{\lambda}_t)$  respectively satisfy:*

1.  $\|\nabla_{\boldsymbol{\lambda}} \mathcal{L}(\boldsymbol{\theta}_t, \boldsymbol{\lambda}_t)\|_2^2 \leq 2C^2 + 2\delta^2\eta^2 \|\boldsymbol{\lambda}_t\|_2^2;$
2.  $\left\| \nabla_{\boldsymbol{\theta}} \widehat{\mathcal{L}}_t(\boldsymbol{\theta}_t, \boldsymbol{\lambda}_t) \right\|_2^2 \leq 4L^2 + 4L_{\mathbf{g}}^2 \|\boldsymbol{\lambda}_t\|_2^2 + 2 \left\| \nabla_{\boldsymbol{\theta}} \widehat{\text{PR}}_t(\boldsymbol{\theta}_t) - \nabla_{\boldsymbol{\theta}} \text{PR}(\boldsymbol{\theta}_t) \right\|_2^2.$

Note that the bound of  $\left\| \nabla_{\boldsymbol{\theta}} \widehat{\mathcal{L}}_t(\boldsymbol{\theta}_t, \boldsymbol{\lambda}_t) \right\|_2^2$  involves the term  $\left\| \nabla_{\boldsymbol{\theta}} \widehat{\text{PR}}_t(\boldsymbol{\theta}_t) - \nabla_{\boldsymbol{\theta}} \text{PR}(\boldsymbol{\theta}_t) \right\|_2^2$ , which is the gradient approximation error at the  $t$ th iteration. Proofs of Lemma C1 and Lemma C2 are respectively given in § C.1 and § C.1. With these two Lemmas, we are ready to prove Lemma 3.

*Proof of Lemma 3.* By Lemma C1, we have

$$\begin{aligned} \sum_{t=1}^T (\mathcal{L}(\boldsymbol{\theta}_t, \boldsymbol{\lambda}) - \mathcal{L}(\boldsymbol{\theta}, \boldsymbol{\lambda}_t)) &\leq \frac{2R^2}{\eta} + \frac{\|\boldsymbol{\lambda}\|_2^2}{2\eta} + \frac{\eta}{2} \sum_{t=1}^T \|\nabla_{\boldsymbol{\lambda}} \mathcal{L}(\boldsymbol{\theta}_t, \boldsymbol{\lambda}_t)\|_2^2 + \frac{\eta}{2} \sum_{t=1}^T \|\nabla_{\boldsymbol{\theta}} \widehat{\mathcal{L}}_t(\boldsymbol{\theta}_t, \boldsymbol{\lambda}_t)\|_2^2 \\ &\quad + \frac{a}{2} \sum_{t=1}^T \|\boldsymbol{\theta}_t - \boldsymbol{\theta}\|_2^2 + \frac{1}{2a} \sum_{t=1}^T \|\nabla_{\boldsymbol{\theta}} \widehat{\text{PR}}_t(\boldsymbol{\theta}_t) - \nabla_{\boldsymbol{\theta}} \text{PR}(\boldsymbol{\theta}_t)\|_2^2, \end{aligned} \quad (\text{c2})$$

where  $a > 0$  is a constant. Note that in (c2), we utilize the following inequality:

$$\begin{aligned} \langle \boldsymbol{\theta}_t - \boldsymbol{\theta}, \nabla_{\boldsymbol{\theta}} \mathcal{L}(\boldsymbol{\theta}_t, \boldsymbol{\lambda}_t) - \nabla_{\boldsymbol{\theta}} \widehat{\mathcal{L}}_t(\boldsymbol{\theta}_t, \boldsymbol{\lambda}_t) \rangle &= \langle \boldsymbol{\theta}_t - \boldsymbol{\theta}, \nabla_{\boldsymbol{\theta}} \text{PR}(\boldsymbol{\theta}_t) - \nabla_{\boldsymbol{\theta}} \widehat{\text{PR}}_t(\boldsymbol{\theta}_t) \rangle \\ &\leq \frac{a}{2} \|\boldsymbol{\theta}_t - \boldsymbol{\theta}\|_2^2 + \frac{1}{2a} \|\nabla_{\boldsymbol{\theta}} \text{PR}(\boldsymbol{\theta}_t) - \nabla_{\boldsymbol{\theta}} \widehat{\text{PR}}_t(\boldsymbol{\theta}_t)\|_2^2. \end{aligned}$$

Taking expectation over (c2) and plugging into the results in Lemma C2, we have

$$\begin{aligned} &\sum_{t=1}^T (\mathbb{E}[\text{PR}(\boldsymbol{\theta}_t)] - \text{PR}(\boldsymbol{\theta}_{\text{PO}})) + \sum_{t=1}^T \mathbb{E} \langle \boldsymbol{\lambda}_t, \mathbf{g}(\boldsymbol{\theta}_t) \rangle - \sum_{t=1}^T \mathbb{E} \langle \boldsymbol{\lambda}_t, \mathbf{g}(\boldsymbol{\theta}_{\text{PO}}) \rangle - \frac{\delta\eta T}{2} \|\boldsymbol{\lambda}\|_2^2 + \frac{\delta\eta}{2} \sum_{t=1}^T \mathbb{E} \|\boldsymbol{\lambda}_t\|_2^2 \\ &\leq \frac{2R^2}{\eta} + \frac{\|\boldsymbol{\lambda}\|_2^2}{2\eta} + \eta T (C^2 + 2L^2) + \eta (\delta^2\eta^2 + 2L_{\mathbf{g}}^2) \sum_{t=1}^T \mathbb{E} \|\boldsymbol{\lambda}_t\|_2^2 \\ &\quad + \frac{a}{2} \sum_{t=1}^T \mathbb{E} \|\boldsymbol{\theta}_t - \boldsymbol{\theta}\|_2^2 + \left(\frac{1}{2a} + \eta\right) \sum_{t=1}^T \mathbb{E} \|\nabla_{\boldsymbol{\theta}} \widehat{\text{PR}}_t(\boldsymbol{\theta}_t) - \nabla_{\boldsymbol{\theta}} \text{PR}(\boldsymbol{\theta}_t)\|_2^2, \end{aligned} \quad (\text{c3})$$

where we set  $\boldsymbol{\theta}$  to  $\boldsymbol{\theta}_{\text{PO}}$  since any  $\boldsymbol{\theta} \in \Theta$  satisfies (c2). In (c3), the term  $\sum_{t=1}^T \boldsymbol{\lambda}_t^\top \mathbf{g}(\boldsymbol{\theta}_{\text{PO}})$  on the left side is non-positive and can be omitted, because we always have  $\boldsymbol{\lambda}_t \geq \mathbf{0}$  and  $\mathbf{g}(\boldsymbol{\theta}_{\text{PO}}) \leq \mathbf{0}$ ,  $\forall t \in [T]$ . Then, rearranging the term in (c3) gives

$$\begin{aligned} &\sum_{t=1}^T (\mathbb{E}[\text{PR}(\boldsymbol{\theta}_t)] - \text{PR}(\boldsymbol{\theta}_{\text{PO}})) + \sum_{t=1}^T \mathbb{E} \langle \boldsymbol{\lambda}_t, \mathbf{g}(\boldsymbol{\theta}_t) \rangle - \frac{1}{2} \left(\frac{1}{\eta} + \delta\eta T\right) \|\boldsymbol{\lambda}\|_2^2 \\ &\leq \frac{\eta}{2} (2\delta^2\eta^2 - \delta + 4L_{\mathbf{g}}^2) \sum_{t=1}^T \mathbb{E} \|\boldsymbol{\lambda}_t\|_2^2 + \frac{2R^2}{\eta} + \eta T (C^2 + 2L^2) \\ &\quad + \frac{a}{2} \sum_{t=1}^T \mathbb{E} \|\boldsymbol{\theta}_t - \boldsymbol{\theta}\|_2^2 + \left(\frac{1}{2a} + \eta\right) \sum_{t=1}^T \mathbb{E} \|\nabla_{\boldsymbol{\theta}} \widehat{\text{PR}}_t(\boldsymbol{\theta}_t) - \nabla_{\boldsymbol{\theta}} \text{PR}(\boldsymbol{\theta}_t)\|_2^2. \end{aligned} \quad (\text{c4})$$

In (c4), the first term can be removed by properly choosing the stepsize  $\eta$  and the parameter  $\delta$ , so that the coefficient  $\frac{\eta}{2} (2\delta^2\eta^2 - \delta + 4L_{\mathbf{g}}^2) \leq 0$ . Since  $2\delta^2\eta^2 - \delta + 4L_{\mathbf{g}}^2$  is quadratic in  $\eta$  and  $\eta > 0$ , the following range of  $\delta$  meets the desired inequality:

$$\delta \in \left[ \frac{1 - \sqrt{1 - 32\eta^2 L_{\mathbf{g}}^2}}{4\eta^2}, \frac{1 + \sqrt{1 - 32\eta^2 L_{\mathbf{g}}^2}}{4\eta^2} \right].$$

We set  $\eta = \frac{1}{\sqrt{T}}$ . To guarantee that the value of  $\delta$  within the above interval is a real number, we require  $1 - 32\eta^2 L_{\mathbf{g}}^2 \geq 0$ , i.e., the time horizon  $T \geq 32L_{\mathbf{g}}^2$ .

Next, we deal with the term  $\frac{a}{2} \sum_{t=1}^T \mathbb{E} \|\boldsymbol{\theta}_t - \boldsymbol{\theta}\|_2^2$  in (c4). By the  $\gamma$ -convexity of the performative risk  $\text{PR}(\boldsymbol{\theta})$  give in Lemma 2, for any  $\boldsymbol{\theta}_t \in \Theta$ , we have

$$\text{PR}(\boldsymbol{\theta}_t) \geq \text{PR}(\boldsymbol{\theta}_{\text{PO}}) + \langle \nabla_{\boldsymbol{\theta}} \text{PR}(\boldsymbol{\theta}_{\text{PO}}), \boldsymbol{\theta}_t - \boldsymbol{\theta}_{\text{PO}} \rangle + \frac{\gamma}{2} \|\boldsymbol{\theta}_t - \boldsymbol{\theta}_{\text{PO}}\|_2^2.$$

From the optimality conditions,  $\langle \nabla_{\boldsymbol{\theta}} \text{PR}(\boldsymbol{\theta}_{\text{PO}}), \boldsymbol{\theta}_t - \boldsymbol{\theta}_{\text{PO}} \rangle \geq 0$ ,  $\forall t \in [T]$ . Then, we have

$$\frac{a}{2} \sum_{t=1}^T \mathbb{E} \|\boldsymbol{\theta}_t - \boldsymbol{\theta}_{\text{PO}}\|_2^2 \leq \sum_{t=1}^T \frac{a}{\gamma} (\mathbb{E}[\text{PR}(\boldsymbol{\theta}_t)] - \text{PR}(\boldsymbol{\theta}_{\text{PO}})).$$

Further, since any  $\boldsymbol{\lambda} \in \mathbb{R}_+^m$  satisfies Eq. (c4), we set  $\boldsymbol{\lambda} = \frac{\mathbb{E}[\sum_{t=1}^T \mathbf{g}(\boldsymbol{\theta}_t)]^+}{\frac{1}{\gamma} + \delta \eta T}$ . With the above results, we obtain

$$\begin{aligned} & \left(1 - \frac{a}{\gamma}\right) \sum_{t=1}^T (\mathbb{E}[\text{PR}(\boldsymbol{\theta}_t)] - \text{PR}(\boldsymbol{\theta}_{\text{PO}})) + \frac{\left\| \mathbb{E} \left[ \sum_{t=1}^T \mathbf{g}(\boldsymbol{\theta}_t) \right]^+ \right\|_2^2}{2(1+\delta)\sqrt{T}} \\ & \leq \sqrt{T} (2R^2 + C^2 + 2L^2) + \left( \frac{1}{2a} + \frac{1}{\sqrt{T}} \right) \sum_{t=1}^T \mathbb{E} \left\| \nabla_{\boldsymbol{\theta}} \widehat{\text{PR}}_t(\boldsymbol{\theta}_t) - \nabla_{\boldsymbol{\theta}} \text{PR}(\boldsymbol{\theta}_t) \right\|_2^2. \quad (\text{c5}) \end{aligned}$$

Choosing  $a \in (0, \gamma)$  and omitting the second term (non-negative) on the left side of (c5), we obtain

$$\begin{aligned} \sum_{t=1}^T (\mathbb{E}[\text{PR}(\boldsymbol{\theta}_t)] - \text{PR}(\boldsymbol{\theta}_{\text{PO}})) & \leq \frac{\gamma\sqrt{T}}{\gamma-a} (2R^2 + C^2 + 2L^2) \\ & \quad + \frac{\gamma}{\gamma-a} \left( \frac{1}{2a} + \frac{1}{\sqrt{T}} \right) \sum_{t=1}^T \mathbb{E} \left\| \nabla_{\boldsymbol{\theta}} \widehat{\text{PR}}_t(\boldsymbol{\theta}_t) - \nabla_{\boldsymbol{\theta}} \text{PR}(\boldsymbol{\theta}_t) \right\|_2^2, \end{aligned}$$

which proves the regret bound in Lemma 3. Similarly, with  $a \in (0, \gamma)$ , the first term on the left side of (c5) is also non-negative. Omitting it gives

$$\begin{aligned} \frac{\sum_{i=1}^m \left( \left\| \mathbb{E} \left[ \sum_{t=1}^T g_i(\boldsymbol{\theta}_t) \right]^+ \right\|_2 \right)^2}{2(1+\delta)\sqrt{T}} & \leq \sqrt{T} (2R^2 + C^2 + 2L^2) \\ & \quad + \left( \frac{1}{2a} + \frac{1}{\sqrt{T}} \right) \sum_{t=1}^T \mathbb{E} \left\| \nabla_{\boldsymbol{\theta}} \widehat{\text{PR}}_t(\boldsymbol{\theta}_t) - \nabla_{\boldsymbol{\theta}} \text{PR}(\boldsymbol{\theta}_t) \right\|_2^2. \quad (\text{c6}) \end{aligned}$$

For each  $\left( \left\| \mathbb{E} \left[ \sum_{t=1}^T g_i(\boldsymbol{\theta}_t) \right]^+ \right\|_2 \right)^2, i \in [m]$ , the above inequality also holds. Then, taking the square root on both sides of (c6) and using the inequality  $\sqrt{a+b+c} \leq \sqrt{a} + \sqrt{b} + \sqrt{c}, \forall a, b, c \geq 0$ , we obtain

$$\begin{aligned} \left\| \mathbb{E} \left[ \sum_{t=1}^T g_i(\boldsymbol{\theta}_t) \right]^+ \right\|_2 & \leq \sqrt{1+\delta} (2R + \sqrt{2}C + 2L) \sqrt{T} \\ & \quad + \sqrt{1+\delta} \left( \frac{T^{\frac{1}{4}}}{\sqrt{a}} + \sqrt{2} \right) \left( \sum_{t=1}^T \mathbb{E} \left\| \nabla_{\boldsymbol{\theta}} \widehat{\text{PR}}_t(\boldsymbol{\theta}_t) - \nabla_{\boldsymbol{\theta}} \text{PR}(\boldsymbol{\theta}_t) \right\|_2^2 \right)^{\frac{1}{2}}. \end{aligned}$$

As  $\mathbb{E} \left[ \sum_{t=1}^T g_i(\boldsymbol{\theta}_t) \right] \leq \left\| \mathbb{E} \left[ \sum_{t=1}^T g_i(\boldsymbol{\theta}_t) \right]^+ \right\|_2$ , the constraint violation result in Lemma 3 is derived.  $\square$

### C.1 Proof of Lemma C1

The proof of Lemma C1 utilizes the following fact about a property of the projection operator.

**Fact C1.** Suppose that set  $\mathcal{A} \subset \mathbb{R}^d$  is closed and convex. Then, for any  $\mathbf{y} \in \mathbb{R}^d$  and  $\mathbf{x} \in \mathcal{A}$ , we have

$$\|\mathbf{x} - \Pi_{\mathcal{A}}(\mathbf{y})\|_2 \leq \|\mathbf{x} - \mathbf{y}\|_2,$$

where  $\Pi_{\mathcal{A}}(\mathbf{y})$  denotes the projection of  $\mathbf{y}$  onto the set  $\mathcal{A}$ .

With Fact C1, the proof of Lemma C1 is given below.

From Lemma 2 and Assumption 3, we know that  $\mathcal{L}(\boldsymbol{\theta}, \boldsymbol{\lambda}_t)$  is convex in  $\boldsymbol{\theta}$ . Then, we have

$$\mathcal{L}(\boldsymbol{\theta}, \boldsymbol{\lambda}_t) \geq \mathcal{L}(\boldsymbol{\theta}_t, \boldsymbol{\lambda}_t) + \langle \nabla_{\boldsymbol{\theta}} \mathcal{L}(\boldsymbol{\theta}_t, \boldsymbol{\lambda}_t), \boldsymbol{\theta} - \boldsymbol{\theta}_t \rangle.$$

Similarly, since  $\mathcal{L}(\mathbf{x}, \boldsymbol{\lambda})$  is concave in  $\boldsymbol{\lambda}$ , we have

$$\mathcal{L}(\boldsymbol{\theta}_t, \boldsymbol{\lambda}) \leq \mathcal{L}(\boldsymbol{\theta}_t, \boldsymbol{\lambda}_t) + \langle \nabla_{\boldsymbol{\lambda}} \mathcal{L}(\boldsymbol{\theta}_t, \boldsymbol{\lambda}_t), \boldsymbol{\lambda} - \boldsymbol{\lambda}_t \rangle.$$

Combining the above two inequalities yields

$$\mathcal{L}(\boldsymbol{\theta}_t, \boldsymbol{\lambda}) - \mathcal{L}(\boldsymbol{\theta}, \boldsymbol{\lambda}_t) \leq \langle \nabla_{\boldsymbol{\lambda}} \mathcal{L}(\boldsymbol{\theta}_t, \boldsymbol{\lambda}_t), \boldsymbol{\lambda} - \boldsymbol{\lambda}_t \rangle - \langle \nabla_{\boldsymbol{\theta}} \mathcal{L}(\boldsymbol{\theta}_t, \boldsymbol{\lambda}_t), \boldsymbol{\theta} - \boldsymbol{\theta}_t \rangle. \quad (\text{c7})$$

From the update rule of  $\boldsymbol{\lambda}$  given in (6), we have

$$\begin{aligned} \|\boldsymbol{\lambda} - \boldsymbol{\lambda}_{t+1}\|_2^2 &= \left\| \boldsymbol{\lambda} - [\boldsymbol{\lambda}_t + \eta \nabla_{\boldsymbol{\lambda}} \mathcal{L}(\boldsymbol{\theta}_t, \boldsymbol{\lambda}_t)]^+ \right\|_2^2 \\ &\stackrel{(a)}{\leq} \|\boldsymbol{\lambda} - \boldsymbol{\lambda}_t\|_2^2 + \eta^2 \|\nabla_{\boldsymbol{\lambda}} \mathcal{L}(\boldsymbol{\theta}_t, \boldsymbol{\lambda}_t)\|_2^2 - 2\eta \langle \boldsymbol{\lambda} - \boldsymbol{\lambda}_t, \nabla_{\boldsymbol{\lambda}} \mathcal{L}(\boldsymbol{\theta}_t, \boldsymbol{\lambda}_t) \rangle, \end{aligned} \quad (\text{c8})$$

where (a) is based on Fact C1. Rearranging the terms in (c8) gives

$$\langle \boldsymbol{\lambda} - \boldsymbol{\lambda}_t, \nabla_{\boldsymbol{\lambda}} \mathcal{L}(\boldsymbol{\theta}_t, \boldsymbol{\lambda}_t) \rangle \leq \frac{1}{2\eta} \left( \|\boldsymbol{\lambda} - \boldsymbol{\lambda}_t\|_2^2 - \|\boldsymbol{\lambda} - \boldsymbol{\lambda}_{t+1}\|_2^2 \right) + \frac{\eta}{2} \|\nabla_{\boldsymbol{\lambda}} \mathcal{L}(\boldsymbol{\theta}_t, \boldsymbol{\lambda}_t)\|_2^2. \quad (\text{c9})$$

Similarly, from the update rule of  $\boldsymbol{\theta}$  given in (5), we have

$$\begin{aligned} \|\boldsymbol{\theta} - \boldsymbol{\theta}_{t+1}\|_2^2 &= \left\| \boldsymbol{\theta} - \Pi_{\Theta} \left( \boldsymbol{\theta}_t - \eta \nabla_{\boldsymbol{\theta}} \widehat{\mathcal{L}}_t(\boldsymbol{\theta}_t, \boldsymbol{\lambda}_t) \right) \right\|_2^2 \\ &\leq \|\boldsymbol{\theta} - \boldsymbol{\theta}_t\|_2^2 + \eta^2 \left\| \nabla_{\boldsymbol{\theta}} \widehat{\mathcal{L}}_t(\boldsymbol{\theta}_t, \boldsymbol{\lambda}_t) \right\|_2^2 + 2\eta \langle \boldsymbol{\theta} - \boldsymbol{\theta}_t, \nabla_{\boldsymbol{\theta}} \widehat{\mathcal{L}}_t(\boldsymbol{\theta}_t, \boldsymbol{\lambda}_t) \rangle. \end{aligned} \quad (\text{c10})$$

Rearranging the terms in (c10) gives

$$\langle \boldsymbol{\theta}_t - \boldsymbol{\theta}, \nabla_{\boldsymbol{\theta}} \widehat{\mathcal{L}}_t(\boldsymbol{\theta}_t, \boldsymbol{\lambda}_t) \rangle \leq \frac{1}{2\eta} \left( \|\boldsymbol{\theta} - \boldsymbol{\theta}_t\|_2^2 - \|\boldsymbol{\theta} - \boldsymbol{\theta}_{t+1}\|_2^2 \right) + \frac{\eta}{2} \left\| \nabla_{\boldsymbol{\theta}} \widehat{\mathcal{L}}_t(\boldsymbol{\theta}_t, \boldsymbol{\lambda}_t) \right\|_2^2.$$

Then, we have

$$\begin{aligned} \langle \boldsymbol{\theta}_t - \boldsymbol{\theta}, \nabla_{\boldsymbol{\theta}} \mathcal{L}(\boldsymbol{\theta}_t, \boldsymbol{\lambda}_t) \rangle &\leq \frac{1}{2\eta} \left( \|\boldsymbol{\theta} - \boldsymbol{\theta}_t\|_2^2 - \|\boldsymbol{\theta} - \boldsymbol{\theta}_{t+1}\|_2^2 \right) + \frac{\eta}{2} \left\| \nabla_{\boldsymbol{\theta}} \widehat{\mathcal{L}}_t(\boldsymbol{\theta}_t, \boldsymbol{\lambda}_t) \right\|_2^2 \\ &\quad + \langle \boldsymbol{\theta}_t - \boldsymbol{\theta}, \nabla_{\boldsymbol{\theta}} \mathcal{L}(\boldsymbol{\theta}_t, \boldsymbol{\lambda}_t) - \nabla_{\boldsymbol{\theta}} \widehat{\mathcal{L}}_t(\boldsymbol{\theta}_t, \boldsymbol{\lambda}_t) \rangle. \end{aligned} \quad (\text{c11})$$

Plugging (c9) and (c11) into (c7) yields

$$\begin{aligned} \mathcal{L}(\boldsymbol{\theta}_t, \boldsymbol{\lambda}) - \mathcal{L}(\boldsymbol{\theta}, \boldsymbol{\lambda}_t) &\leq \frac{1}{2\eta} \left( \|\boldsymbol{\lambda} - \boldsymbol{\lambda}_t\|_2^2 - \|\boldsymbol{\lambda} - \boldsymbol{\lambda}_{t+1}\|_2^2 \right) + \frac{\eta}{2} \|\nabla_{\boldsymbol{\lambda}} \mathcal{L}(\boldsymbol{\theta}_t, \boldsymbol{\lambda}_t)\|_2^2 \\ &\quad + \frac{1}{2\eta} \left( \|\boldsymbol{\theta} - \boldsymbol{\theta}_t\|_2^2 - \|\boldsymbol{\theta} - \boldsymbol{\theta}_{t+1}\|_2^2 \right) + \frac{\eta}{2} \left\| \nabla_{\boldsymbol{\theta}} \widehat{\mathcal{L}}_t(\boldsymbol{\theta}_t, \boldsymbol{\lambda}_t) \right\|_2^2 \\ &\quad + \langle \boldsymbol{\theta}_t - \boldsymbol{\theta}, \nabla_{\boldsymbol{\theta}} \mathcal{L}(\boldsymbol{\theta}_t, \boldsymbol{\lambda}_t) - \nabla_{\boldsymbol{\theta}} \widehat{\mathcal{L}}_t(\boldsymbol{\theta}_t, \boldsymbol{\lambda}_t) \rangle. \end{aligned} \quad (\text{c12})$$

Summing (c12) over  $t \in [T]$  yields

$$\begin{aligned} \sum_{t=1}^T (\mathcal{L}(\boldsymbol{\theta}_t, \boldsymbol{\lambda}) - \mathcal{L}(\boldsymbol{\theta}, \boldsymbol{\lambda}_t)) &\leq \frac{1}{2\eta} \left( \|\boldsymbol{\lambda} - \boldsymbol{\lambda}_1\|_2^2 - \|\boldsymbol{\lambda} - \boldsymbol{\lambda}_{T+1}\|_2^2 \right) + \frac{\eta}{2} \sum_{t=1}^T \|\nabla_{\boldsymbol{\lambda}} \mathcal{L}(\boldsymbol{\theta}_t, \boldsymbol{\lambda}_t)\|_2^2 \\ &\quad + \frac{1}{2\eta} \left( \|\boldsymbol{\theta} - \boldsymbol{\theta}_1\|_2^2 - \|\boldsymbol{\theta} - \boldsymbol{\theta}_{T+1}\|_2^2 \right) + \frac{\eta}{2} \sum_{t=1}^T \left\| \nabla_{\boldsymbol{\theta}} \widehat{\mathcal{L}}_t(\boldsymbol{\theta}_t, \boldsymbol{\lambda}_t) \right\|_2^2 \\ &\quad + \sum_{t=1}^T \langle \boldsymbol{\theta}_t - \boldsymbol{\theta}, \nabla_{\boldsymbol{\theta}} \mathcal{L}(\boldsymbol{\theta}_t, \boldsymbol{\lambda}_t) - \nabla_{\boldsymbol{\theta}} \widehat{\mathcal{L}}_t(\boldsymbol{\theta}_t, \boldsymbol{\lambda}_t) \rangle. \end{aligned} \quad (\text{c13})$$

Since  $\boldsymbol{\lambda}_1 = \mathbf{0}$ ,  $\|\boldsymbol{\theta} - \boldsymbol{\theta}_1\|_2^2 \leq 4R^2$ , Lemma C1 is proved by omitting the non-positive terms in (c13).

## C.2 Proof of Lemma C2

From the definition of  $\nabla_{\lambda}\mathcal{L}(\boldsymbol{\theta}, \boldsymbol{\lambda})$ , for any  $t \in [T]$ , we have

$$\|\nabla_{\lambda}\mathcal{L}(\boldsymbol{\theta}_t, \boldsymbol{\lambda}_t)\|_2^2 = \|\mathbf{g}(\boldsymbol{\theta}_t) - \delta\eta\boldsymbol{\lambda}_t\|_2^2 \leq 2\|\mathbf{g}(\boldsymbol{\theta}_t)\|_2^2 + 2\delta^2\eta^2\|\boldsymbol{\lambda}_t\|_2^2 \stackrel{(a)}{\leq} 2C^2 + 2\delta^2\eta^2\|\boldsymbol{\lambda}_t\|_2^2,$$

where (a) is based on the boundedness of the constraint  $\mathbf{g}(\boldsymbol{\theta})$  given in Assumption 3. Similarly, from the definition of  $\nabla_{\boldsymbol{\theta}}\mathcal{L}(\boldsymbol{\theta}_t, \boldsymbol{\lambda}_t)$ , for any  $t \in [T]$ , we have

$$\begin{aligned} \|\nabla_{\boldsymbol{\theta}}\mathcal{L}(\boldsymbol{\theta}_t, \boldsymbol{\lambda}_t)\|_2^2 &= \|\nabla_{\boldsymbol{\theta}}\text{PR}(\boldsymbol{\theta}_t) + \nabla_{\boldsymbol{\theta}}\mathbf{g}(\boldsymbol{\theta}_t)^\top \boldsymbol{\lambda}_t\|_2^2 \\ &\leq 2\|\nabla_{\boldsymbol{\theta}}\text{PR}(\boldsymbol{\theta}_t)\|_2^2 + 2\|\nabla_{\boldsymbol{\theta}}\mathbf{g}(\boldsymbol{\theta}_t)^\top \boldsymbol{\lambda}_t\|_2^2 \\ &\stackrel{(a)}{\leq} 2L^2 + 2L_{\mathbf{g}}^2\|\boldsymbol{\lambda}_t\|_2^2, \end{aligned}$$

where (a) is based on the Lipschitz continuity of both the performative risk and the constraint. Then, we have

$$\begin{aligned} \left\|\nabla_{\boldsymbol{\theta}}\widehat{\mathcal{L}}_t(\boldsymbol{\theta}_t, \boldsymbol{\lambda}_t)\right\|_2^2 &= \left\|\nabla_{\boldsymbol{\theta}}\mathcal{L}(\boldsymbol{\theta}_t, \boldsymbol{\lambda}_t) + \nabla_{\boldsymbol{\theta}}\widehat{\text{PR}}_t(\boldsymbol{\theta}_t) - \nabla_{\boldsymbol{\theta}}\text{PR}(\boldsymbol{\theta}_t)\right\|_2^2 \\ &\leq 2\|\nabla_{\boldsymbol{\theta}}\mathcal{L}(\boldsymbol{\theta}_t, \boldsymbol{\lambda}_t)\|_2^2 + 2\left\|\nabla_{\boldsymbol{\theta}}\widehat{\text{PR}}_t(\boldsymbol{\theta}_t) - \nabla_{\boldsymbol{\theta}}\text{PR}(\boldsymbol{\theta}_t)\right\|_2^2 \\ &\leq 4L^2 + 4L_{\mathbf{g}}^2\|\boldsymbol{\lambda}_t\|_2^2 + 2\left\|\nabla_{\boldsymbol{\theta}}\widehat{\text{PR}}_t(\boldsymbol{\theta}_t) - \nabla_{\boldsymbol{\theta}}\text{PR}(\boldsymbol{\theta}_t)\right\|_2^2. \end{aligned}$$

By now, Lemma C2 is proved.

## D Proof of Lemma 4

The proof of Lemma 4 will involve the accumulated parameter estimation error  $\sum_{t=1}^T \left\|\widehat{\mathbf{A}}_t - \mathbf{A}\right\|_{\text{F}}^2$ , which is bounded by the following lemma.

**Lemma D1 (Parameter Estimation Error).** *Let  $\zeta_t = \frac{2}{\kappa_1(t-1) + 2\kappa_3}$ ,  $\forall t \in [T]$ . Under Assumption 5, the accumulated parameter estimation error is upper bounded by:*

$$\sum_{t=1}^T \mathbb{E} \left\|\widehat{\mathbf{A}}_t - \mathbf{A}\right\|_{\text{F}}^2 \leq \bar{\alpha} \ln(T),$$

where  $\bar{\alpha} := \max \left\{ \frac{2\kappa_3}{\kappa_1} \left\|\widehat{\mathbf{A}}_0 - \mathbf{A}\right\|_{\text{F}}^2, \frac{8\kappa_2 \text{tr}(\boldsymbol{\Sigma})}{\kappa_1^2} \right\}$ .

See § E for the proof. Next, we proceed to prove Lemma 4.

*Proof of Lemma 4.* To facilitate our analysis, we introduce a finite-sample approximation for the gradient  $\nabla_{\boldsymbol{\theta}}\text{PR}(\boldsymbol{\theta})$ , defined as

$$\nabla_{\boldsymbol{\theta}}\widehat{\text{PR}}(\boldsymbol{\theta}) := \frac{1}{n} \sum_{i=1}^n [\nabla_{\boldsymbol{\theta}}\ell(\boldsymbol{\theta}; Z_{0,i} + \mathbf{A}\boldsymbol{\theta}) + \mathbf{A}^\top \nabla_{Z\ell}(\boldsymbol{\theta}, Z_{0,i} + \mathbf{A}\boldsymbol{\theta})].$$

Then, we have the following inequality:

$$\begin{aligned} &\left\|\nabla_{\boldsymbol{\theta}}\widehat{\text{PR}}_t(\boldsymbol{\theta}_t) - \nabla_{\boldsymbol{\theta}}\text{PR}(\boldsymbol{\theta}_t)\right\|_2^2 \\ &\leq 2\left\|\nabla_{\boldsymbol{\theta}}\widehat{\text{PR}}_t(\boldsymbol{\theta}_t) - \nabla_{\boldsymbol{\theta}}\widehat{\text{PR}}(\boldsymbol{\theta}_t)\right\|_2^2 + 2\left\|\nabla_{\boldsymbol{\theta}}\widehat{\text{PR}}(\boldsymbol{\theta}_t) - \nabla_{\boldsymbol{\theta}}\text{PR}(\boldsymbol{\theta}_t)\right\|_2^2. \end{aligned} \quad (\text{d1})$$

From Assumption 4, we have

$$\begin{aligned} &\mathbb{E} \left\|\nabla_{\boldsymbol{\theta}}\widehat{\text{PR}}(\boldsymbol{\theta}_t) - \nabla_{\boldsymbol{\theta}}\text{PR}(\boldsymbol{\theta}_t)\right\|_2^2 \\ &\leq \frac{1}{n^2} \sum_{i=1}^n \mathbb{E}_{Z_{0,i} \sim \mathcal{D}_0} \left\|\nabla_{\boldsymbol{\theta}}\ell(\boldsymbol{\theta}_t; Z_{0,i} + \mathbf{A}\boldsymbol{\theta}_t) + \mathbf{A}^\top \nabla_{Z\ell}(\boldsymbol{\theta}_t; Z_{0,i} + \mathbf{A}\boldsymbol{\theta}_t) - \nabla_{\boldsymbol{\theta}}\text{PR}(\boldsymbol{\theta}_t)\right\|_2^2 \leq \frac{\sigma^2}{n}. \end{aligned}$$

The first term in (d1) is handled as follows. Plugging into the expression of  $\nabla_{\boldsymbol{\theta}}\widehat{\text{PR}}_t(\boldsymbol{\theta}_t)$  and  $\nabla_{\boldsymbol{\theta}}\widehat{\text{PR}}(\boldsymbol{\theta}_t)$ , we have

$$\begin{aligned} & \left\| \nabla_{\boldsymbol{\theta}}\widehat{\text{PR}}_t(\boldsymbol{\theta}_t) - \nabla_{\boldsymbol{\theta}}\widehat{\text{PR}}(\boldsymbol{\theta}_t) \right\|_2^2 \\ & \leq \frac{2}{n^2} \sum_{i=1}^n \left\| \nabla_{\boldsymbol{\theta}}\ell(\boldsymbol{\theta}_t; Z_{0,i} + \widehat{\mathbf{A}}_t\boldsymbol{\theta}_t) - \nabla_{\boldsymbol{\theta}}\ell(\boldsymbol{\theta}_t; Z_{0,i} + \mathbf{A}\boldsymbol{\theta}_t) \right\|_2^2 \\ & \quad + \frac{2}{n^2} \sum_{i=1}^n \left\| \widehat{\mathbf{A}}_t^\top \nabla_Z \ell(\boldsymbol{\theta}_t; Z_{0,i} + \widehat{\mathbf{A}}_t\boldsymbol{\theta}_t) - \mathbf{A}^\top \nabla_Z \ell(\boldsymbol{\theta}_t; Z_{0,i} + \mathbf{A}\boldsymbol{\theta}_t) \right\|_2^2. \end{aligned} \quad (\text{d2})$$

With the  $\beta$ -smoothness of the loss function given in Assumption 1, we have

$$\frac{2}{n^2} \sum_{i=1}^n \left\| \nabla_{\boldsymbol{\theta}}\ell(\boldsymbol{\theta}_t; Z_{0,i} + \widehat{\mathbf{A}}_t\boldsymbol{\theta}_t) - \nabla_{\boldsymbol{\theta}}\ell(\boldsymbol{\theta}_t; Z_{0,i} + \mathbf{A}\boldsymbol{\theta}_t) \right\|_2^2 \leq \frac{2\beta^2}{n} \left\| \widehat{\mathbf{A}}_t - \mathbf{A} \right\|_{\text{F}}^2 \|\boldsymbol{\theta}_t\|_2^2.$$

Moreover, the last term in (d2) is bounded by

$$\begin{aligned} & \frac{2}{n^2} \sum_{i=1}^n \left\| \widehat{\mathbf{A}}_t^\top \nabla_Z \ell(\boldsymbol{\theta}_t; Z_{0,i} + \widehat{\mathbf{A}}_t\boldsymbol{\theta}_t) - \mathbf{A}^\top \nabla_Z \ell(\boldsymbol{\theta}_t; Z_{0,i} + \mathbf{A}\boldsymbol{\theta}_t) \right\|_2^2 \\ & \leq \frac{4}{n^2} \sum_{i=1}^n \left\| \widehat{\mathbf{A}}_t - \mathbf{A} \right\|_{\text{F}}^2 \left\| \nabla_Z \ell(\boldsymbol{\theta}_t; Z_{0,i} + \widehat{\mathbf{A}}_t\boldsymbol{\theta}_t) \right\|_2^2 \\ & \quad + \frac{4\sigma_{\max}(\mathbf{A})}{n^2} \sum_{i=1}^n \left\| \nabla_Z \ell(\boldsymbol{\theta}_t; Z_{0,i} + \widehat{\mathbf{A}}_t\boldsymbol{\theta}_t) - \nabla_Z \ell(\boldsymbol{\theta}_t; Z_{0,i} + \mathbf{A}\boldsymbol{\theta}_t) \right\|_2^2 \\ & \stackrel{(a)}{\leq} \frac{4L_Z^2}{n} \left\| \widehat{\mathbf{A}}_t - \mathbf{A} \right\|_{\text{F}}^2 + \frac{4\beta^2\sigma_{\max}(\mathbf{A})}{n} \left\| \widehat{\mathbf{A}}_t - \mathbf{A} \right\|_{\text{F}}^2 \|\boldsymbol{\theta}_t\|_2^2, \end{aligned}$$

where (a) is because the loss function is  $\beta$ -smooth and  $L_Z$  Lipschitz continuous in  $Z$ . Plugging the above results into (d1) and taking expectation yields

$$\mathbb{E} \left\| \nabla_{\boldsymbol{\theta}}\widehat{\text{PR}}_t(\boldsymbol{\theta}_t) - \nabla_{\boldsymbol{\theta}}\text{PR}(\boldsymbol{\theta}_t) \right\|_2^2 \leq \frac{2\sigma^2}{n} + \frac{4}{n} (2L_Z^2 + \beta^2 R^2 (1 + 2\sigma_{\max}(\mathbf{A}))) \mathbb{E} \left\| \widehat{\mathbf{A}}_t - \mathbf{A} \right\|_{\text{F}}^2,$$

where we utilize the boundedness of the available set that  $\|\boldsymbol{\theta}\|_2 \leq R, \forall \boldsymbol{\theta} \in \Theta$ . Summing the above inequality over  $T$  iterations yields

$$\begin{aligned} & \sum_{t=1}^T \mathbb{E} \left\| \nabla_{\boldsymbol{\theta}}\widehat{\text{PR}}_t(\boldsymbol{\theta}_t) - \nabla_{\boldsymbol{\theta}}\text{PR}(\boldsymbol{\theta}_t) \right\|_2^2 \\ & \leq \frac{2T\sigma^2}{n} + \frac{4}{n} (2L_Z^2 + \beta^2 R^2 (1 + 2\sigma_{\max}(\mathbf{A}))) \sum_{t=1}^T \mathbb{E} \left\| \widehat{\mathbf{A}}_t - \mathbf{A} \right\|_{\text{F}}^2. \end{aligned}$$

Plugging into the result in Lemma D1 proves Lemma 4.  $\square$

## E Proof of Lemma D1

The proof of Lemma D1 utilizes the following two supporting lemmas.

**Lemma E1 (One-Step Improvement).** *Suppose that Assumption 5 holds. For any  $t \in [T]$ , choose stepsize  $\zeta_t \in \left(0, \frac{2}{\kappa_3}\right)$ . Then, the parameter estimates satisfy:*

$$\mathbb{E} \left[ \left\| \widehat{\mathbf{A}}_t - \mathbf{A} \right\|_{\text{F}}^2 \middle| \widehat{\mathbf{A}}_{t-1} \right] \leq (1 - \kappa_1 \zeta_t (2 - \zeta_t \kappa_3)) \left\| \widehat{\mathbf{A}}_{t-1} - \mathbf{A} \right\|_{\text{F}}^2 + 2\zeta_t^2 \kappa_2 \text{tr}(\boldsymbol{\Sigma}), \forall t \in [T].$$

**Lemma E2 (Sequence Result).** *Consider a sequence  $\{S_t\}_{t=1}^T$  satisfying*

$$S_t \leq \left(1 - \frac{2}{t-1+t_0}\right) S_{t-1} + \frac{\alpha}{(t-1+t_0)^2}, \forall t \in [T],$$

where  $t_0 \geq 0$  and  $\alpha > 0$  are two constants. Then, we have

$$S_t \leq \frac{\max\{t_0 S_0, \alpha\}}{t+t_0}, \forall t \in [T].$$



Proofs of Lemma E1 and Lemma E2 are respectively given in § E.1 and § E.2. With these two Lemmas, the proof of Lemma D1 is given below.

*Proof of Lemma D1.* For any  $t \in [T]$ , set  $\zeta_t = \frac{2}{\kappa_1(t-1 + \frac{2\kappa_3}{\kappa_1})}$ . Then, we have  $2 - \zeta_t \kappa_3 = 2 - \frac{2\kappa_3}{\kappa_1(t-1) + 2\kappa_3} \geq 1$ . Plugging this inequality into Lemma E1, we have

$$\mathbb{E} \left[ \left\| \widehat{\mathbf{A}}_t - \mathbf{A} \right\|_{\text{F}}^2 \middle| \widehat{\mathbf{A}}_{t-1} \right] \leq \left( 1 - \frac{2}{t-1 + \frac{2\kappa_3}{\kappa_1}} \right) \left\| \widehat{\mathbf{A}}_{t-1} - \mathbf{A} \right\|_{\text{F}}^2 + \frac{8\kappa_2 \text{tr}(\boldsymbol{\Sigma})}{\kappa_1^2 \left( t-1 + \frac{2\kappa_3}{\kappa_1} \right)^2}.$$

Define  $\bar{\alpha} := \max \left\{ \frac{2\kappa_3}{\kappa_1} \left\| \widehat{\mathbf{A}}_0 - \mathbf{A} \right\|_{\text{F}}^2, \frac{8\kappa_2 \text{tr}(\boldsymbol{\Sigma})}{\kappa_1^2} \right\}$ . By Lemma E2, we have

$$\mathbb{E} \left\| \widehat{\mathbf{A}}_t - \mathbf{A} \right\|_{\text{F}}^2 \leq \frac{\bar{\alpha}}{t + \frac{2\kappa_3}{\kappa_1}}.$$

Summing the above inequality yields

$$\sum_{t=1}^T \mathbb{E} \left\| \widehat{\mathbf{A}}_t - \mathbf{A} \right\|_{\text{F}}^2 \leq \sum_{t=1}^T \frac{\bar{\alpha}}{t + \frac{2\kappa_3}{\kappa_1}} \leq \bar{\alpha} \left( \ln \left( T + \frac{2\kappa_3}{\kappa_1} \right) - \ln \left( \frac{2\kappa_3}{\kappa_1} \right) \right) \leq \bar{\alpha} \ln(T),$$

which proves Lemma D1.  $\square$

### E.1 Proof of Lemma E1

Denote by  $\mathbf{b}_t := Z'_t - Z_t$ . We have  $\mathbb{E}[\mathbf{b}_t | \mathbf{u}_t] = \mathbf{A}\mathbf{u}_t$ . Then,

$$\mathbb{E} \left[ \left\| \mathbf{A}\mathbf{u}_t - \mathbf{b}_t \right\|_2^2 \middle| \mathbf{u}_t \right] = \text{tr} \left( \mathbb{E} \left( \mathbf{A}\mathbf{u}_t - \mathbf{b}_t \right) \left( \mathbf{A}\mathbf{u}_t - \mathbf{b}_t \right)^\top \middle| \mathbf{u}_t \right) = 2 \text{tr}(\boldsymbol{\Sigma}). \quad (\text{e1})$$

Recall that  $\boldsymbol{\Sigma}$  is the variance of the base distribution  $\mathcal{D}_0$ . In Algorithm 1, the update rule of the parameter estimate is  $\widehat{\mathbf{A}}_t = \widehat{\mathbf{A}}_{t-1} - \zeta_t \left( \widehat{\mathbf{A}}_{t-1} \mathbf{u}_t - \mathbf{b}_t \right) \mathbf{u}_t^\top$ . Thus, we have

$$\begin{aligned} \left\| \widehat{\mathbf{A}}_t - \mathbf{A} \right\|_{\text{F}}^2 &= \left\| \widehat{\mathbf{A}}_{t-1} - \mathbf{A} - \zeta_t \left( \widehat{\mathbf{A}}_{t-1}^\top \mathbf{u}_t - \mathbf{b}_t \right) \mathbf{u}_t^\top \right\|_{\text{F}}^2 \\ &= \left\| \widehat{\mathbf{A}}_{t-1} - \mathbf{A} \right\|_{\text{F}}^2 - 2\zeta_t \left\langle \widehat{\mathbf{A}}_{t-1} - \mathbf{A}, \left( \widehat{\mathbf{A}}_{t-1} \mathbf{u}_t - \mathbf{b}_t \right) \mathbf{u}_t^\top \right\rangle + \zeta_t^2 \left\| \left( \widehat{\mathbf{A}}_{t-1} \mathbf{u}_t - \mathbf{b}_t \right) \mathbf{u}_t^\top \right\|_{\text{F}}^2. \end{aligned}$$

Given  $\widehat{\mathbf{A}}_{t-1}$  and  $\mathbf{u}_t$ , taking conditional expectation on the above equation gives

$$\begin{aligned} &\mathbb{E} \left[ \left\| \widehat{\mathbf{A}}_t - \mathbf{A} \right\|_{\text{F}}^2 \middle| \widehat{\mathbf{A}}_{t-1}, \mathbf{u}_t \right] \\ &= \left\| \widehat{\mathbf{A}}_{t-1} - \mathbf{A} \right\|_{\text{F}}^2 - 2\zeta_t \left\langle \widehat{\mathbf{A}}_{t-1} - \mathbf{A}, \left( \widehat{\mathbf{A}}_{t-1} \mathbf{u}_t - \mathbb{E}[\mathbf{b}_t | \mathbf{u}_t] \right) \mathbf{u}_t^\top \right\rangle + \zeta_t^2 \mathbb{E} \left[ \left\| \left( \widehat{\mathbf{A}}_{t-1} \mathbf{u}_t - \mathbf{b}_t \right) \mathbf{u}_t^\top \right\|_{\text{F}}^2 \middle| \widehat{\mathbf{A}}_{t-1}, \mathbf{u}_t \right] \\ &= \left\| \widehat{\mathbf{A}}_{t-1} - \mathbf{A} \right\|_{\text{F}}^2 - 2\zeta_t \left\| \left( \widehat{\mathbf{A}}_{t-1} - \mathbf{A} \right) \mathbf{u}_t \right\|_2^2 + \zeta_t^2 \left\| \mathbf{u}_t \right\|_2^2 \mathbb{E} \left[ \left\| \widehat{\mathbf{A}}_{t-1} \mathbf{u}_t - \mathbf{b}_t \right\|_2^2 \middle| \widehat{\mathbf{A}}_{t-1}, \mathbf{u}_t \right]. \quad (\text{e2}) \end{aligned}$$

The term  $\mathbb{E} \left[ \left\| \widehat{\mathbf{A}}_{t-1} \mathbf{u}_t - \mathbf{b}_t \right\|_2^2 \middle| \widehat{\mathbf{A}}_{t-1}, \mathbf{u}_t \right]$  in (e2) satisfies

$$\begin{aligned} &\mathbb{E} \left[ \left\| \widehat{\mathbf{A}}_{t-1} \mathbf{u}_t - \mathbf{b}_t \right\|_2^2 \middle| \widehat{\mathbf{A}}_{t-1}, \mathbf{u}_t \right] \\ &= \left\| \widehat{\mathbf{A}}_{t-1} \mathbf{u}_t - \mathbf{A}\mathbf{u}_t \right\|_2^2 + \mathbb{E} \left[ \left\| \mathbf{A}\mathbf{u}_t - \mathbf{b}_t \right\|_2^2 \middle| \mathbf{u}_t \right] + 2 \left\langle \widehat{\mathbf{A}}_{t-1} \mathbf{u}_t - \mathbf{A}\mathbf{u}_t, \mathbf{A}\mathbf{u}_t - \mathbb{E}[\mathbf{b}_t | \mathbf{u}_t] \right\rangle \\ &\stackrel{(a)}{=} \left\| \left( \widehat{\mathbf{A}}_{t-1} - \mathbf{A} \right) \mathbf{u}_t \right\|_2^2 + 2 \text{tr}(\boldsymbol{\Sigma}). \quad (\text{e3}) \end{aligned}$$

where (a) is from (e1) and  $\mathbb{E}[\mathbf{b}_t | \mathbf{u}_t] = \mathbf{A} \mathbf{u}_t$ . Plugging (e3) into (e2) gives

$$\begin{aligned} \mathbb{E} \left[ \left\| \widehat{\mathbf{A}}_t - \mathbf{A} \right\|_{\text{F}}^2 \middle| \widehat{\mathbf{A}}_{t-1}, \mathbf{u}_t \right] &= \left\| \widehat{\mathbf{A}}_{t-1} - \mathbf{A} \right\|_{\text{F}}^2 - 2\zeta_t \left\| \left( \widehat{\mathbf{A}}_{t-1} - \mathbf{A} \right) \mathbf{u}_t \right\|_2^2 \\ &\quad + \zeta_t^2 \left\| \mathbf{u}_t \right\|_2^2 \left\| \left( \widehat{\mathbf{A}}_{t-1} - \mathbf{A} \right) \mathbf{u}_t \right\|_2^2 + 2\zeta_t^2 \left\| \mathbf{u}_t \right\|_2^2 \text{tr}(\boldsymbol{\Sigma}). \end{aligned} \quad (\text{e4})$$

Taking conditional expectation over the random noise  $\mathbf{u}_t$  gives

$$\begin{aligned} \mathbb{E} \left[ \left\| \mathbf{u}_t \right\|_2^2 \left\| \left( \widehat{\mathbf{A}}_{t-1} - \mathbf{A} \right) \mathbf{u}_t \right\|_2^2 \middle| \widehat{\mathbf{A}}_{t-1} \right] &= \left\langle \left( \widehat{\mathbf{A}}_{t-1} - \mathbf{A} \right) \left( \widehat{\mathbf{A}}_{t-1} - \mathbf{A} \right)^\top, \mathbb{E} \left[ \left\| \mathbf{u}_t \right\|_2^2 \mathbf{u}_t \mathbf{u}_t^\top \middle| \widehat{\mathbf{A}}_{t-1} \right] \right\rangle \\ &\leq \kappa_3 \mathbb{E} \left[ \left\| \left( \widehat{\mathbf{A}}_{t-1} - \mathbf{A} \right) \mathbf{u}_t \right\|_2^2 \middle| \widehat{\mathbf{A}}_{t-1} \right]. \end{aligned} \quad (\text{e5})$$

Plugging (e5) into (e4) yields

$$\begin{aligned} \mathbb{E} \left[ \left\| \widehat{\mathbf{A}}_t - \mathbf{A} \right\|_{\text{F}}^2 \middle| \widehat{\mathbf{A}}_{t-1} \right] &\leq \left\| \widehat{\mathbf{A}}_{t-1} - \mathbf{A} \right\|_{\text{F}}^2 - (2\zeta_t - \zeta_t^2 \kappa_3) \mathbb{E} \left[ \left\| \left( \widehat{\mathbf{A}}_{t-1} - \mathbf{A} \right) \mathbf{u}_t \right\|_2^2 \middle| \widehat{\mathbf{A}}_{t-1} \right] + 2\zeta_t^2 \kappa_2 \text{tr}(\boldsymbol{\Sigma}). \end{aligned}$$

Further, we have

$$\mathbb{E} \left[ \left\| \left( \widehat{\mathbf{A}}_{t-1} - \mathbf{A} \right) \mathbf{u}_t \right\|_2^2 \middle| \widehat{\mathbf{A}}_{t-1} \right] = \text{tr} \left( \left( \widehat{\mathbf{A}}_{t-1} - \mathbf{A} \right)^\top \left( \widehat{\mathbf{A}}_{t-1} - \mathbf{A} \right) \mathbb{E} \left[ \mathbf{u}_t \mathbf{u}_t^\top \middle| \widehat{\mathbf{A}}_{t-1} \right] \right) \geq \kappa_1 \left\| \widehat{\mathbf{A}}_{t-1} - \mathbf{A} \right\|_{\text{F}}^2.$$

Then, choosing  $\zeta_t \in \left( 0, \frac{2}{\kappa_3} \right)$ , we obtain

$$\mathbb{E} \left[ \left\| \widehat{\mathbf{A}}_t - \mathbf{A} \right\|_{\text{F}}^2 \middle| \widehat{\mathbf{A}}_{t-1} \right] \leq (1 - \kappa_1 \zeta_t (2 - \zeta_t \kappa_3)) \left\| \widehat{\mathbf{A}}_{t-1} - \mathbf{A} \right\|_{\text{F}}^2 + 2\zeta_t^2 \kappa_2 \text{tr}(\boldsymbol{\Sigma}),$$

which proves Lemma E1.

## E.2 Proof of Lemma E2

We prove Lemma E2 by induction. First, for  $t = 0$ ,  $S_0 \leq \frac{\max\{t_0 S_0, \alpha\}}{t_0}$  automatically holds. Define  $\bar{\alpha} := \max\{t_0 S_0, \alpha\}$ . Suppose that  $S_{t-1} \leq \frac{\bar{\alpha}}{t-1+t_0}$  holds. Then, we have

$$\begin{aligned} S_t &\leq \left( 1 - \frac{2}{t-1+t_0} \right) S_t + \frac{\alpha}{(t-1+t_0)^2} \\ &\leq \left( 1 - \frac{2}{t-1+t_0} \right) \frac{\bar{\alpha}}{t-1+t_0} + \frac{\alpha}{(t-1+t_0)^2} \\ &\leq \frac{\bar{\alpha}}{t-1+t_0} - \frac{2\bar{\alpha}}{(t-1+t_0)^2} + \frac{\bar{\alpha}}{(t-1+t_0)^2} \\ &\leq \frac{\bar{\alpha}}{t-1+t_0} - \frac{\bar{\alpha}}{(t-1+t_0)^2} \leq \frac{\bar{\alpha}}{t+t_0}, \end{aligned}$$

where the last inequality is based on the fact that  $(t+t_0)(t-2+t_0) = (t-1-t_0)^2 - 1 \leq (t-1-t_0)^2$ . Thus,  $\frac{1}{t-1+t_0} - \frac{1}{(t-1+t_0)^2} = \frac{t-2+t_0}{(t-1-t_0)^2} \leq \frac{1}{t+t_0}$ . By now, we have proved Lemma E2.

## F Experiment Details

In this section, we elaborate on the simulation details of the numerical experiments in Section 5.

### F.1 Multi-Task Linear Regression

The multi-task linear regression is conducted over a randomly generated Erdos-Renyi graph with  $n = 10$  nodes. The probability of an edge between any pair of nodes in the Erdos-Renyi graph

is 0.5. The decision dimension of each task is set to be 3. The decision of task  $i$  is initialized as  $\boldsymbol{\theta}_i = \mathbf{0}, \forall i \in \mathcal{V}$ . The injected noises  $\{\mathbf{u}_t\}_{t=1}^T$  are independently drawn from  $\mathcal{N}(\mathbf{0}, \mathbf{I})$ . The number of iterations is  $T = 10^6$ . The number of initial samples is  $n = 10^3$ . The stepsize of the alternating gradient update is  $\eta = 5 \times 10^{-3}$ . The control parameter is  $\delta = 1$ . The stepsize of the online parameter estimation at the  $t$ th iteration is  $\zeta_t = \frac{1}{t+10}, \forall t \in [T]$ .

**Data Generation Process:** For any  $i \in \mathcal{V}$ , given a parameter vector  $\boldsymbol{\theta}_i \in \mathbb{R}^d$ , the feature-label pair  $(\mathbf{x}_i, y_i)$  is generated as follows:

1.  $\mathbf{x}_i \sim \mathcal{N}(\mathbf{0}, \boldsymbol{\Sigma}_{\mathbf{x}_i})$ , where  $\boldsymbol{\Sigma}_{\mathbf{x}_i}$  is a random symmetric positive-definite matrix with nuclear norm  $d$ .
2.  $y_i = \boldsymbol{\beta}_i^\top \mathbf{x}_i + \boldsymbol{\mu}_i^\top \boldsymbol{\theta}_i + w_i$ , where  $\boldsymbol{\beta}_i \sim \mathcal{N}(\mathbf{0}, \mathbf{I})$  and  $w_i \sim \mathcal{N}(0, \sigma_i^2)$  with  $\sigma_i^2 = 1$ .

This distribution map is a location family with sensitivity parameter  $\varepsilon = \sum_{i \in \mathcal{V}} \|\boldsymbol{\mu}_i\|_2$ . To generate all the vectors  $\{\boldsymbol{\mu}_i\}_{i \in \mathcal{V}}$ , we first independently draw  $|\mathcal{V}|$  samples from  $\mathcal{N}(\mathbf{0}, \mathbf{I})$  and then projected their concatenation onto the sphere of radius  $\varepsilon$ .

In constraint-free case, given the squared-loss  $\ell_i(\boldsymbol{\theta}_i; (\mathbf{x}_i, y_i)) = \frac{1}{2}(y_i - \boldsymbol{\theta}_i^\top \mathbf{x}_i)^2$  and the linearity of the performative effect, the performative optimum of each task  $i$ , denoted by  $\boldsymbol{\theta}_{i, \text{PO}}$ , can be computed in closed-form as

$$\boldsymbol{\theta}_{i, \text{PO}} = \mathcal{C}_{\mathbf{x}_i \mathbf{x}_i}^{-1} \mathcal{C}_{\mathbf{x}_i y_i}, \forall i \in \mathcal{V},$$

where  $\mathcal{C}_{\mathbf{x}_i \mathbf{x}_i} := \boldsymbol{\Sigma}_{\mathbf{x}_i} + \boldsymbol{\mu}_i \boldsymbol{\mu}_i^\top$  and  $\mathcal{C}_{\mathbf{x}_i y_i} := \boldsymbol{\Sigma}_{\mathbf{x}_i} \boldsymbol{\beta}_i$ ,  $\forall i \in \mathcal{V}$ . Correspondingly, the minimum performative risk is given by

$$\text{PR}(\boldsymbol{\theta}_{\text{PO}}) = \sum_{i \in \mathcal{V}} \mathcal{C}_{y_i y_i} - \mathcal{C}_{y_i \mathbf{x}_i} \mathcal{C}_{\mathbf{x}_i \mathbf{x}_i}^{-1} \mathcal{C}_{\mathbf{x}_i y_i},$$

where  $\boldsymbol{\theta}_{\text{PO}}$  is the concatenation of  $\boldsymbol{\theta}_{i, \text{PO}}$  for all  $i \in \mathcal{V}$ ,  $\mathcal{C}_{y_i y_i} := \boldsymbol{\beta}_i^\top \boldsymbol{\Sigma}_{\mathbf{x}_i} \boldsymbol{\beta}_i + \sigma_i^2$ ,  $\mathcal{C}_{y_i \mathbf{x}_i} = \mathcal{C}_{\mathbf{x}_i y_i}^\top$ .

The constraint associated with each neighboring node pair  $(i, j) \in \mathcal{E}$  is set to be

$$\|\boldsymbol{\theta}_i - \boldsymbol{\theta}_j\|_2^2 \leq \|\boldsymbol{\theta}_{i, \text{PO}} - \boldsymbol{\theta}_{j, \text{PO}}\|_2^2 + (b'_{ij})^2,$$

where  $\{b'_{ij}\}_{(i,j) \in \mathcal{E}}$  are uniformly drawn from the region  $[0, 0.02]$  in a symmetry manner, i.e.,  $b'_{ij} = b'_{ji}, \forall (i, j) \in \mathcal{E}$ .

Let  $\boldsymbol{\theta}$  be the concatenation of  $\boldsymbol{\theta}_i$  for all  $i \in \mathcal{V}$ . The approximate performative gradient of APDA is computed by

$$\nabla_{\boldsymbol{\theta}} \widehat{\text{PR}}_t(\boldsymbol{\theta}_t) = \frac{1}{n} \sum_{i \in \mathcal{V}} \sum_{j=1}^n \left[ \left( y_{i,j} - \boldsymbol{\theta}_{i,t}^\top \mathbf{x}_{i,j} \right) \left( \hat{\boldsymbol{\mu}}_{i,t} - \mathbf{x}_{i,j} \right) \right], \forall t \in [T].$$

The approximate performative gradient of PD-PS is computed by

$$\nabla_{\boldsymbol{\theta}} \widehat{\text{PR}}_t(\boldsymbol{\theta}_t) = -\frac{1}{n} \sum_{i \in \mathcal{V}} \sum_{j=1}^n \left[ \left( y_{i,j} - \boldsymbol{\theta}_{i,t}^\top \mathbf{x}_{i,j} \right) \mathbf{x}_{i,j} \right], \forall t \in [T].$$

The approximate performative gradient of the ‘‘baseline’’ is computed by

$$\nabla_{\boldsymbol{\theta}} \text{PR}_t(\boldsymbol{\theta}_t) = \frac{1}{n} \sum_{i \in \mathcal{V}} \sum_{j=1}^n \left[ \left( y_{i,j} - \boldsymbol{\theta}_{i,t}^\top \mathbf{x}_{i,j} \right) \left( \boldsymbol{\mu}_i - \mathbf{x}_{i,j} \right) \right], \forall t \in [T].$$

The performative risk is computed by

$$\text{PR}(\boldsymbol{\theta}_t) = \mathcal{C}_{y_i y_i} - \mathcal{C}_{y_i \mathbf{x}_i} \boldsymbol{\theta}_t - \boldsymbol{\theta}_t^\top \mathcal{C}_{\mathbf{x}_i y_i} + \boldsymbol{\theta}_t^\top \mathcal{C}_{\mathbf{x}_i \mathbf{x}_i}^{-1} \boldsymbol{\theta}_t, \forall t \in [T].$$

All results are averaged over 100 realizations.

## F.2 Multi-Asset Portfolio

In the implementation of the multi-asset portfolio, we add a regularizer  $\xi\|\boldsymbol{\theta}\|_2^2$  to the original loss function to make it strongly convex. This gives the optimization problem:

$$\begin{aligned} \min_{\boldsymbol{\theta}} \quad & -\mathbb{E}_{\mathbf{z} \sim \mathcal{D}(\boldsymbol{\theta})} \mathbf{z}^\top \boldsymbol{\theta} + \xi\|\boldsymbol{\theta}\|_2^2 \\ \text{s.t.} \quad & \sum_{i=1}^l \theta_i \leq 1, \\ & \mathbf{0} \preceq \boldsymbol{\theta} \preceq \epsilon \cdot \mathbf{1}, \\ & \mathbf{s}^\top \boldsymbol{\theta} \leq S, \\ & \boldsymbol{\theta}^\top \boldsymbol{\Psi} \boldsymbol{\theta} \leq \rho. \end{aligned}$$

In the simulation, we set the number of assets  $l = 10$ . The initial investment decision  $\boldsymbol{\theta}_1$  is randomly chosen within the feasible set. The injected noises  $\{\mathbf{u}_t\}_{t=1}^T$  are independently drawn from  $\mathcal{N}(\mathbf{0}, \mathbf{I})$ . The parameter  $\xi$  in the regularizer is set to be  $\epsilon$ . The maximum amount of investment to one asset is  $\epsilon = 0.3$ . The entries of the bid-ask spread vector  $\mathbf{s}$  are independently and uniformly drawn from the region  $[2, 4]$ . The maximum allowable bid-ask spread is  $S = 2$ . The risk tolerance threshold is  $\rho = 0.01$ . The number of iterations is  $T = 10^6$ . The number of initial samples is  $n = 10^3$ . The stepsize of the alternating gradient update is  $\eta = 5 \times 10^{-3}$ . The control parameter is  $\delta = 1$ . The stepsize of the online parameter estimation at the  $t$ th iteration is  $\zeta_t = \frac{1}{t+10}, \forall t \in [T]$ .

**Data Generation Process:** The rate of return follows  $\mathbf{z} = \bar{\mathbf{z}} + \mathbf{A}\boldsymbol{\theta} + \mathbf{u}_z$ , where  $\bar{\mathbf{z}}$  is a constant vector,  $\mathbf{u}_z \sim \mathcal{N}(\mathbf{0}, \boldsymbol{\Sigma}_z)$ , and  $\boldsymbol{\Sigma}_z$  is a random symmetric positive-definite matrix with nuclear norm  $1/l$ . To generate  $\bar{\mathbf{z}}$ , we first uniformly draw a sample within the region  $[10\epsilon, 1 + 10\epsilon]$  and then project it onto the sphere of radius 2.

This distribution map is a location family with sensitivity parameter  $\epsilon = \sigma_{\max}(\mathbf{A})$ . Optimization of the multi-asset portfolio problem requires the covariance matrix of  $\mathbf{z}$ , which is unknown. Note that the randomness of  $\mathbf{z}$  lies in the term  $\mathbf{u}_z$ . Then, we have  $\boldsymbol{\Psi} = \boldsymbol{\Sigma}_z$ . The covariance matrix  $\boldsymbol{\Sigma}_z$  can be approximated based on the initial samples drawn from  $\mathcal{D}(\mathbf{0})$ . The optimal investment is computed by CVX tools [Grant and Boyd, 2014].

The approximate performative gradient of APDA is given by

$$\nabla_{\boldsymbol{\theta}} \widehat{\text{PR}}_t(\boldsymbol{\theta}_t) = -\frac{1}{n} \sum_{i=1}^l \sum_{j=1}^n \mathbf{z}_j + (2\xi \cdot \mathbf{I} - \widehat{\mathbf{A}}_t) \boldsymbol{\theta}, \forall t \in [T].$$

The approximate performative gradient of PD-PS is given by

$$\nabla_{\boldsymbol{\theta}} \widehat{\text{PR}}_t(\boldsymbol{\theta}_t) = -\frac{1}{n} \sum_{i=1}^l \sum_{j=1}^n \mathbf{z}_j + 2\xi \boldsymbol{\theta}, \forall t \in [T].$$

The approximate performative of the ‘‘baseline’’ is given by

$$\nabla_{\boldsymbol{\theta}} \widehat{\text{PR}}_t(\boldsymbol{\theta}_t) = -\frac{1}{n} \sum_{i=1}^l \sum_{j=1}^n \mathbf{z}_j + (2\xi \cdot \mathbf{I} - \mathbf{A}) \boldsymbol{\theta}, \forall t \in [T].$$

The performative risk is given by

$$\text{PR}(\boldsymbol{\theta}_t) = \bar{\mathbf{z}}^\top \boldsymbol{\theta}_t + \boldsymbol{\theta}_t^\top \mathbf{A} \boldsymbol{\theta}_t + \xi\|\boldsymbol{\theta}_t\|_2^2.$$

All results are averaged over 100 realizations.
